# Supplementary material for: A transcriptomic analysis for identifying the unintended effects of introducing a heterologous glyphosate-tolerant EPSP synthase into Escherichia coli
Source: Royal Society of Chemistry journal article supplement (doi:10.1039/c4mb00566j), 2015-01-06
Supplement: c4mb00566j3.pdf [file c4mb00566j3.pdf]

**Supplementary Table S3 Summary of regulated pathways in response to expressing EPSP synthase**

| Locus                              | Locus Tag | Product Name                                                                                              | Fold <sup>a</sup> |
|------------------------------------|-----------|-----------------------------------------------------------------------------------------------------------|-------------------|
| <b>Shikimate pathway</b>           |           |                                                                                                           |                   |
| <i>aroA</i>                        | b0908     | 5-enolpyruvylshikimate-3-phosphate synthetase                                                             | 0.92 ± 0.12       |
| <i>aroB</i>                        | b3389     | 3-dehydroquinate synthase                                                                                 | 0.81 ± 0.12       |
| <i>aroC</i>                        | b2329     | chorismate synthase                                                                                       | 0.86 ± 0.11       |
| <i>aroD</i>                        | b1693     | 3-dehydroquinate dehydratase                                                                              | 0.82 ± 0.08       |
| <i>aroE</i>                        | b3281     | dehydroshikimate reductase                                                                                | 0.90 ± 0.10       |
| <i>aroF</i>                        | b2601     | 3-deoxy-D-arabinoheptulosonate-7-phosphate synthase (DAHP synthetase, tyrosine repressible)               | -1.15 ± 0.15      |
| <i>aroG</i>                        | b0754     | 3-deoxy-D-arabinoheptulosonate-7-phosphate synthase (DAHP synthetase, phenylalanine repressible)          | 0.91 ± 0.09       |
| <i>aroH</i>                        | b1704     | 3-deoxy-D-arabinoheptulosonate-7-phosphate synthase (DAHP synthetase, tryptophan repressible)             | -1.06 ± 0.14      |
| <i>aroK</i>                        | b3390     | shikimate kinase I                                                                                        | 0.91 ± 0.11       |
| <i>aroL</i>                        | b0388     | shikimate kinase II                                                                                       | 0.93 ± 0.14       |
| <i>aroM</i>                        | b0390     | protein of <i>aro</i> operon, regulated by <i>aroR</i>                                                    | -1.14 ± 0.13      |
| <i>aroP</i>                        | b0112     | aromatic amino acid transport protein                                                                     | 0.87 ± 0.10       |
| <i>ydiB</i>                        | b1692     | putative oxidoreductase                                                                                   | -1.40 ± 0.17      |
| <b>Aromatic acids biosynthesis</b> |           |                                                                                                           |                   |
| <i>tyrA</i>                        | b2600     | chorismate mutase-T and prephenate dehydrogenase                                                          | 0.99 ± 0.13       |
| <i>tyrB</i>                        | b4054     | tyrosine aminotransferase, tyrosine repressible                                                           | 0.80 ± 0.09       |
| <i>tyrP</i>                        | b1907     | tyrosine-specific transport system                                                                        | -1.28 ± 0.18      |
| <i>tyrR</i>                        | b1323     | transcriptional regulation of <i>aroF</i> , <i>aroG</i> , <i>tyrA</i> and aromatic amino acid transport   | -1.08 ± 0.15      |
| <i>tyrS</i>                        | b1637     | tyrosine tRNA synthetase                                                                                  | -0.96 ± 0.13      |
| <i>pheA</i>                        | b2599     | chorismate mutase-P and prephenate dehydratase                                                            | -1.14 ± 0.16      |
| <i>aspC</i>                        | b0928     | aspartate aminotransferase                                                                                | 1.20 ± 0.17       |
| <i>ilvE</i>                        | b3770     | branched-chain amino-acid aminotransferase                                                                | 1.32 ± 0.19       |
| <i>trpA</i>                        | b1260     | tryptophan synthase, alpha protein                                                                        | -1.10 ± 0.15      |
| <i>trpB</i>                        | b1261     | tryptophan synthase, beta protein                                                                         | -1.10 ± 0.14      |
| <i>trpC</i>                        | b1262     | N-(5-phosphoribosyl)anthranilate isomerase and indole-3-glycerolphosphate synthetase                      | -1.03 ± 0.09      |
| <i>trpD</i>                        | b1263     | anthranilate synthase component II, glutamine amidotransferase and phosphoribosylanthranilate transferase | -1.38 ± 0.18      |
| <i>trpE</i>                        | b1264     | anthranilate synthase component I                                                                         | -1.20 ± 0.13      |
| <i>trpL</i>                        | b1265     | <i>trp</i> operon leader peptide                                                                          | -1.08 ± 0.15      |
| <i>trpR</i>                        | b4393     | regulator for <i>trp</i> operon and <i>aroH</i> ; <i>trp</i> operon repressor                             | 0.90 ± 0.07       |
| <i>trpS</i>                        | b3384     | tryptophan tRNA synthetase                                                                                | 0.99 ± 0.08       |
| <b><i>tdc</i> operon</b>           |           |                                                                                                           |                   |
| <i>dsdA</i>                        | b2366     | D-serine dehydratase                                                                                      | -1.95 ± 0.25      |
| <i>dsdC</i>                        | b3464     | DNA-binding transcriptional dual regulator                                                                | -1.90 ± 0.12      |
| <i>tdcR</i>                        | b3119     | DNA-binding transcriptional activator                                                                     | -2.89 ± 0.33      |

|                          |       |                                                                 |            |
|--------------------------|-------|-----------------------------------------------------------------|------------|
| <i>tdcA</i>              | b3118 | DNA-binding activator                                           | -2.12±0.29 |
| <i>tdcB</i>              | b3117 | threonine dehydratase                                           | -1.58±0.20 |
| <i>tdcC</i>              | b3116 | threonine/serine transporter                                    | -1.41±0.19 |
| <i>tdcD</i>              | b3115 | propionate kinase                                               | -1.41±0.18 |
| <i>tdcE</i>              | b3114 | 2-ketobutyrate formate-lyase/pyruvate formate-lyase 4, inactive | -3.26±0.30 |
| <i>tdcF</i>              | b3113 | predicted enamine/imine deaminase                               | -1.02±0.15 |
| <i>tdcG</i>              | b3112 | L-serine deaminase III                                          | 0.97±0.14  |
| <b><i>sfm</i> operon</b> |       |                                                                 |            |
| <i>sfmA</i>              | b0530 | predicted fimbrial-like adhesin protein                         | -1.88±0.27 |
| <i>sfmC</i>              | b0531 | predicted pilin chaperone, periplasmic                          | -2.33±0.30 |
| <i>sfmD</i>              | b0532 | putative outer membrane protein, export function                | -1.76±0.19 |
| <i>sfmF</i>              | b0534 | putative fimbrial-like adhesin protein                          | -1.81±0.26 |
| <i>sfmH</i>              | b0533 | predicted fimbrial-like adhesin protein                         | -2.37±0.31 |
| <i>fimZ</i>              | b0535 | transcriptional regulator                                       | -2.18±0.30 |

<sup>a</sup> Changes in expression of genes were represented by mean expression ratios ( $P<0.05$ )
